# Supplementary material for: A Highly Sensitive Immunochromatographic Strip Test for Rapid and Quantitative Detection of Saikosaponin d
Source: PubMed Central journal article supplement (PMC6017486; doi:10.3390/molecules23020338), 2018-02-06
Supplement: molecules-23-00338-s001.pdf [file molecules-23-00338-s001.pdf]

## Supporting information for

# A Highly Sensitive Immunochromatographic Strip Test for Rapid and Quantitative Detection of Saikosaponin d

**Table S1** Variations among ELISA runs for the analysis of SSd

| SSd (ng mL <sup>-1</sup> ) | CV%                |                  |
|----------------------------|--------------------|------------------|
|                            | ELISA <sup>1</sup> | ICS <sup>2</sup> |
| 500                        | 3.76               | 2.49             |
| 1000                       | 4.29               | 2.64             |
| 2000                       | 3.47               | 4.38             |

<sup>1</sup>For the variations, measured values indicate mean  $\pm$  SD for samples run in triplicate on three different microtiter plates. <sup>2</sup>For the variations, six strips were tested for each concentration.
